# Supplementary material for: Stochastic model of vesicular stomatitis virus replication reveals mutational effects on virion production
Source: PubMed Central journal article supplement (PMC10878530; doi:10.1371/journal.pcbi.1011373), 2024-02-07
Supplement: pcbi.1011373.s001.pdf [file pcbi.1011373.s001.pdf]

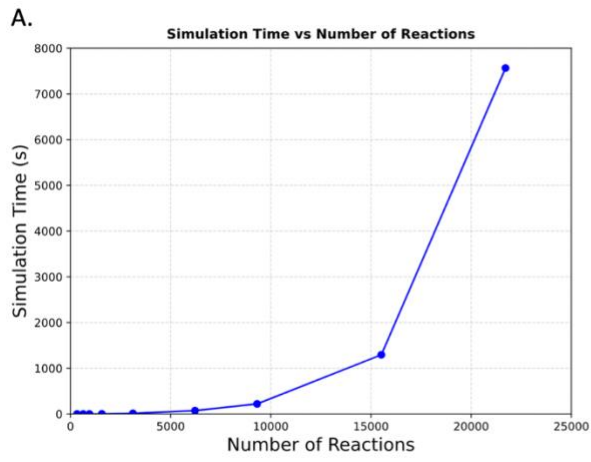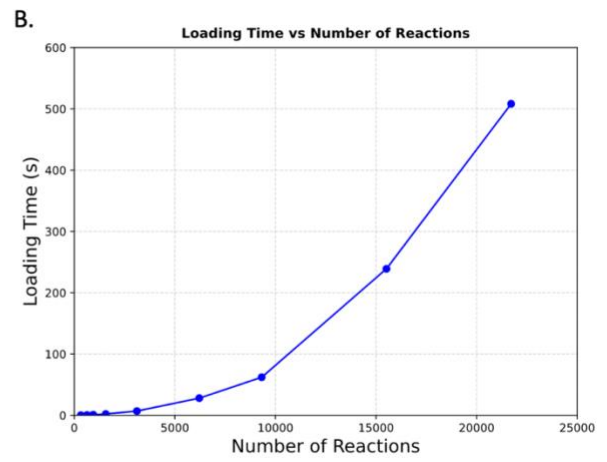

**S1 Fig. Simulation and Loading time of ODE Models Increases as the Number of Reactions in the Model Increase.**
