# Supplementary material for: Stochastic model of vesicular stomatitis virus replication reveals mutational effects on virion production
Source: PubMed Central journal article supplement (PMC10878530; doi:10.1371/journal.pcbi.1011373), 2024-02-07
Supplement: pcbi.1011373.s002.pdf [file pcbi.1011373.s002.pdf]

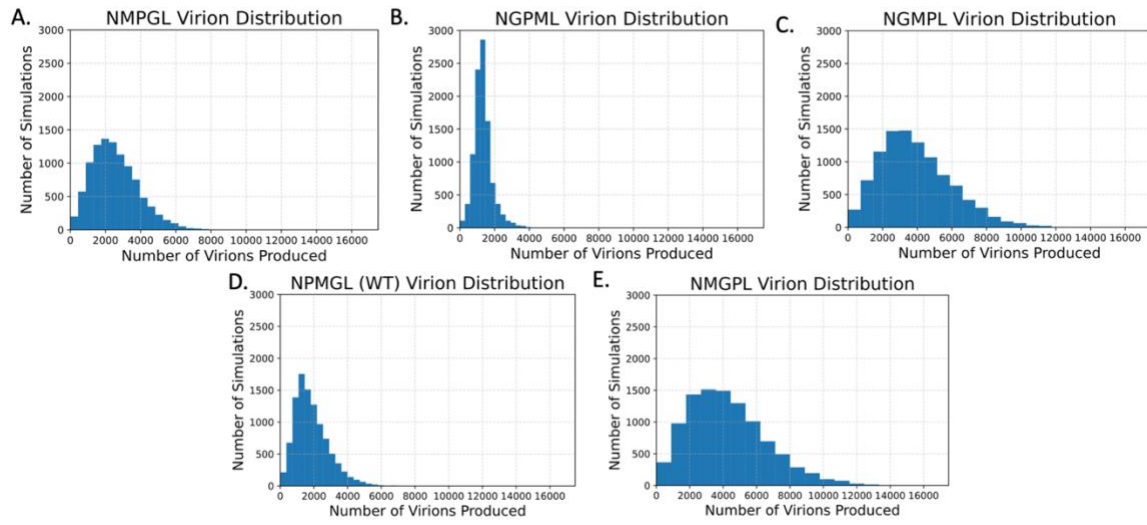

**S2 Fig. Distribution of the number of virions produced by each gene shuffled Vesicular Stomatitis Virus variant used to fit the model. Each plot represents 10,000 simulations.**
