# Supplementary material for: Stochastic model of vesicular stomatitis virus replication reveals mutational effects on virion production
Source: PubMed Central journal article supplement (PMC10878530; doi:10.1371/journal.pcbi.1011373), 2024-02-07
Supplement: pcbi.1011373.s003.pdf [file pcbi.1011373.s003.pdf]

**S1 Table.** Gene Shuffled Vesicular Stomatitis Virus Variants with Associated Statistics

| <b>Variant</b> | <b>Mean Virions Produced</b> | <b>Standard Deviation</b> | <b>Percent of Infections Aborted</b> | <b>Mean/Standard Deviation</b> |
|----------------|------------------------------|---------------------------|--------------------------------------|--------------------------------|
| NMGLP          | 12365.23                     | 11777.92                  | 0.16                                 | 1.05                           |
| NGMLP          | 12355.23                     | 11534.64                  | 0.10                                 | 1.07                           |
| NMLGP          | 10742.46                     | 9275.01                   | 0.08                                 | 1.16                           |
| NLMGP          | 10673.82                     | 9092.71                   | 0.08                                 | 1.17                           |
| NGLMP          | 10629.27                     | 8462.59                   | 0.06                                 | 1.26                           |
| NLGMP          | 10481.59                     | 8520.48                   | 0.12                                 | 1.23                           |
| NMGPL          | 4294.93                      | 2384.08                   | 0.28                                 | 1.80                           |
| NGMPL          | 3914.32                      | 2119.58                   | 0.28                                 | 1.85                           |
| NMPGL          | 2516.32                      | 1332.83                   | 0.48                                 | 1.89                           |
| NPMGL (WT)     | 1863.50                      | 995.86                    | 0.52                                 | 1.87                           |
| MNLGP          | 1670.89                      | 2096.34                   | 1.12                                 | 0.80                           |
| MNGLP          | 1661.36                      | 2123.16                   | 0.76                                 | 0.78                           |
| GNMLP          | 1627.12                      | 2028.92                   | 0.70                                 | 0.80                           |
| LNGMP          | 1619.92                      | 2053.19                   | 0.96                                 | 0.79                           |
| GNLMP          | 1611.76                      | 1979.64                   | 0.64                                 | 0.81                           |
| LNMGMP         | 1609.33                      | 2001.43                   | 0.82                                 | 0.80                           |
| NGPML          | 1327.77                      | 544.17                    | 0.32                                 | 2.44                           |
| MNGPL          | 1310.00                      | 783.27                    | 0.80                                 | 1.67                           |
| GNMPL          | 1205.72                      | 654.81                    | 0.48                                 | 1.84                           |
| NPGML          | 1013.45                      | 444.63                    | 0.46                                 | 2.28                           |
| MNPGL          | 787.04                       | 406.83                    | 0.68                                 | 1.93                           |
| GNPML          | 612.22                       | 259.84                    | 0.62                                 | 2.36                           |
| PNMGL          | 491.90                       | 230.82                    | 1.60                                 | 2.13                           |
| MGNPL          | 377.70                       | 341.54                    | 2.02                                 | 1.11                           |
| GMNPL          | 370.01                       | 332.70                    | 1.78                                 | 1.11                           |
| PNGML          | 367.13                       | 145.45                    | 1.02                                 | 2.52                           |
| MPNGL          | 270.29                       | 183.96                    | 3.16                                 | 1.47                           |
| GPNML          | 229.04                       | 142.79                    | 2.00                                 | 1.60                           |
| PMNGL          | 223.40                       | 142.50                    | 3.54                                 | 1.57                           |
| GLNMP          | 213.67                       | 365.30                    | 6.30                                 | 0.58                           |
| NMLPG          | 212.91                       | 77.97                     | 0.52                                 | 2.73                           |

|       |        |        |       |      |
|-------|--------|--------|-------|------|
| MGNLP | 210.50 | 355.97 | 6.62  | 0.59 |
| GMNLP | 208.30 | 332.44 | 5.92  | 0.63 |
| LMNGP | 206.89 | 345.25 | 6.26  | 0.60 |
| MLNGP | 206.72 | 337.18 | 6.62  | 0.61 |
| LGNMP | 204.04 | 339.15 | 6.74  | 0.60 |
| NLMPG | 192.64 | 68.35  | 0.44  | 2.82 |
| PGNML | 192.50 | 105.70 | 2.56  | 1.82 |
| NMPLG | 161.26 | 55.34  | 0.50  | 2.91 |
| NLPMG | 131.92 | 45.03  | 0.46  | 2.93 |
| NPMLG | 109.96 | 35.92  | 0.54  | 3.06 |
| NLGPM | 101.14 | 36.52  | 0.12  | 2.77 |
| NGLPM | 100.75 | 37.00  | 0.16  | 2.72 |
| NPLMG | 99.71  | 33.72  | 0.76  | 2.96 |
| MNLPG | 95.37  | 51.24  | 1.16  | 1.86 |
| GMPNL | 94.76  | 101.16 | 6.60  | 0.94 |
| MGPNL | 92.92  | 102.26 | 6.68  | 0.91 |
| LNMPG | 92.57  | 47.51  | 0.90  | 1.95 |
| MPGNL | 91.02  | 89.32  | 6.78  | 1.02 |
| GPMNL | 88.54  | 87.78  | 6.32  | 1.01 |
| PMGNL | 82.81  | 76.20  | 7.86  | 1.09 |
| PGMNL | 81.27  | 72.54  | 7.20  | 1.12 |
| NLPGM | 77.44  | 28.14  | 0.22  | 2.75 |
| NGPLM | 77.33  | 27.89  | 0.14  | 2.77 |
| MNPLG | 76.82  | 38.75  | 1.70  | 1.98 |
| LNPMG | 68.78  | 32.47  | 0.92  | 2.12 |
| NPLGM | 59.61  | 21.77  | 0.22  | 2.74 |
| NPGLM | 59.15  | 22.16  | 0.44  | 2.67 |
| LNGPM | 49.83  | 24.26  | 0.54  | 2.05 |
| GNLPM | 49.62  | 24.27  | 0.84  | 2.04 |
| PNMLG | 46.12  | 21.22  | 1.80  | 2.17 |
| PNLMG | 41.37  | 19.01  | 1.74  | 2.18 |
| LMNPG | 40.37  | 27.72  | 2.68  | 1.46 |
| MLNPG | 39.73  | 28.25  | 3.34  | 1.41 |
| GNPLM | 39.16  | 18.82  | 0.78  | 2.08 |
| LNPGM | 38.99  | 18.77  | 0.96  | 2.08 |
| LGMNP | 31.96  | 63.81  | 23.12 | 0.50 |

|       |       |       |       |      |
|-------|-------|-------|-------|------|
| MLGNP | 30.43 | 61.71 | 24.32 | 0.49 |
| GMLNP | 29.75 | 59.00 | 24.22 | 0.50 |
| MPNLG | 29.38 | 18.65 | 4.72  | 1.58 |
| LMGNP | 29.20 | 59.28 | 24.40 | 0.49 |
| LPNMG | 28.91 | 17.82 | 3.28  | 1.62 |
| MGLNP | 28.81 | 55.61 | 24.68 | 0.52 |
| GLMNP | 28.62 | 55.44 | 23.70 | 0.52 |
| GLNPM | 24.69 | 15.69 | 3.46  | 1.57 |
| LGNPM | 24.63 | 15.60 | 3.40  | 1.58 |
| PNLGM | 24.42 | 12.29 | 1.48  | 1.99 |
| PMNLG | 24.05 | 14.85 | 5.36  | 1.62 |
| PNGLM | 24.05 | 12.10 | 1.50  | 1.99 |
| PLNMG | 23.12 | 13.85 | 4.20  | 1.67 |
| MLPNG | 16.99 | 13.44 | 8.58  | 1.26 |
| GPNLM | 16.89 | 10.87 | 5.00  | 1.55 |
| LPNGM | 16.71 | 10.62 | 4.58  | 1.57 |
| LMPNG | 16.47 | 13.26 | 8.74  | 1.24 |
| MPLNG | 15.12 | 11.78 | 10.22 | 1.28 |
| LPMNG | 14.46 | 11.29 | 9.64  | 1.28 |
| PLNGM | 13.22 | 8.60  | 6.28  | 1.54 |
| PGNLM | 13.08 | 8.56  | 6.40  | 1.53 |
| PMLNG | 12.83 | 9.74  | 11.22 | 1.32 |
| PLMNG | 12.74 | 9.61  | 10.80 | 1.33 |
| LGPNM | 11.00 | 8.77  | 12.42 | 1.25 |
| GLPNM | 10.78 | 8.88  | 13.38 | 1.21 |
| GPLNM | 9.33  | 7.54  | 14.98 | 1.24 |
| LPGNM | 9.15  | 7.47  | 15.10 | 1.22 |
| PLGNM | 7.61  | 6.38  | 17.84 | 1.19 |
| PGLNM | 7.56  | 6.25  | 18.36 | 1.21 |
| PLMGN | 1.19  | 1.51  | 84.28 | 0.79 |
| PMGLN | 1.19  | 1.51  | 84.66 | 0.78 |
| PGMLN | 1.16  | 1.51  | 85.26 | 0.76 |
| PMLGN | 1.15  | 1.46  | 85.08 | 0.79 |
| PLGMN | 1.14  | 1.45  | 85.32 | 0.78 |
| PGLMN | 1.12  | 1.41  | 85.00 | 0.79 |
| MPGLN | 0.99  | 1.36  | 86.68 | 0.73 |

|       |      |      |       |      |
|-------|------|------|-------|------|
| LPMGN | 0.98 | 1.37 | 87.08 | 0.72 |
| LPGMN | 0.97 | 1.39 | 86.26 | 0.70 |
| GPMLN | 0.96 | 1.35 | 86.90 | 0.71 |
| MPLGN | 0.96 | 1.36 | 87.58 | 0.70 |
| GPLMN | 0.95 | 1.29 | 86.60 | 0.73 |
| LMPGN | 0.81 | 1.27 | 88.58 | 0.63 |
| LGPMN | 0.77 | 1.16 | 88.80 | 0.67 |
| GLPMN | 0.77 | 1.20 | 89.46 | 0.64 |
| MGPLN | 0.76 | 1.21 | 89.86 | 0.63 |
| MLPGN | 0.76 | 1.20 | 90.34 | 0.64 |
| GMPLN | 0.74 | 1.15 | 90.68 | 0.65 |
| MGLPN | 0.64 | 1.09 | 90.62 | 0.58 |
| LMGPN | 0.63 | 1.07 | 91.34 | 0.59 |
| MLGPN | 0.62 | 1.14 | 91.68 | 0.54 |
| GMLPN | 0.61 | 1.02 | 91.04 | 0.60 |
| GLMPN | 0.61 | 1.09 | 91.38 | 0.57 |
| LGMPN | 0.60 | 1.01 | 91.68 | 0.59 |
